# Supplementary material for: Childhood Passive Smoking Exposure and Age at Menarche in Chinese Women Who Had Never Smoked: The Guangzhou Biobank Cohort Study
Source: PLoS One. 2015 Jul 17;10(7):e0130429. doi: 10.1371/journal.pone.0130429 (PMC4506068; doi:10.1371/journal.pone.0130429)
Supplement: S1 Dataset — (XLS) [file pone.0130429.s001.xls]

## Sheet: Sheet1
	N	%
noneexposure * ageagroup	20061	1
noneexposure * edu3	20061	1
noneexposure * smokernumber	20061	1
noneexposure * exposurefrequency	20061	1
noneexposure * menarchelessthan13	20061	1
			ageagroup
			50-	60-	70-
noneexposure	.00	n	6666	3696	1017	11379
		noneexposure %	0.585816	0.324809	0.0893752	1
		ageagroup %	0.648381	0.503679	0.416462	0.56722
		%	0.332287	0.184238	0.0506954	0.56722
	1.00	n	3615	3642	1425	8682
		noneexposure %	0.416379	0.419489	0.164133	1
		ageagroup %	0.351619	0.496321	0.583538	0.43278
		%	0.1802	0.181546	0.0710333	0.43278
sum		n	10281	7338	2442	20061
		noneexposure %	0.512487	0.365784	0.121729	1
		ageagroup %	1	1	1	1
		%	0.512487	0.365784	0.121729	1
			edu3
			<=primary	middle school	>=college
noneexposure	.00	n	5097	5655	627	11379
		noneexposure %	0.44793	0.496968	0.0551015	1
		edu3 %	0.543622	0.596897	0.517754	0.56722
		%	0.254075	0.28189	0.0312547	0.56722
	1.00	n	4279	3819	584	8682
		noneexposure %	0.492859	0.439876	0.0672656	1
		edu3 %	0.456378	0.403103	0.482246	0.43278
		%	0.213299	0.190369	0.0291112	0.43278
sum			9376	9474	1211	20061
		noneexposure %	0.467375	0.47226	0.0603659	1
		edu3 %	1	1	1	1
		%	0.467375	0.47226	0.0603659	1
			smokernumber
			1.00	2.00	3.00
noneexposure	.00	n	0	8717	2662	11379
		noneexposure %	0	0.76606	0.23394	1
		smokernumber%	0	1	1	0.56722
		%	0	0.434525	0.132695	0.56722
	1.00		8682	0	0	8682
		noneexposure %	1	0	0	1
		smokernumber %	1	0	0	0.43278
		%	0.43278	0	0	0.43278
sum		n	8682	8717	2662	20061
		noneexposure %	0.43278	0.434525	0.132695	1
		smokernumber %	1	1	1	1
		%	0.43278	0.434525	0.132695	1
			exposurefrequency
			none	<5time/w	>=5time/w
noneexposure	.00	n	0	2845	8534	11379
		noneexposure %	0	0.250022	0.749978	1
		exposurefrequency 中的 %	0	1	1	0.56722
		总数的 %	0	0.141817	0.425403	0.56722
	1.00	n	8682	0	0	8682
		noneexposure %	1	0	0	1
		exposurefrequency %	1	0	0	0.43278
		%	0.43278	0	0	0.43278
sum		n	8682	2845	8534	20061
		noneexposure %	0.43278	0.141817	0.425403	1
		exposurefrequency %	1	1	1	1
		%	0.43278	0.141817	0.425403	1
			menarchelessthan13
			1.00	2.00
noneexposure	.00	n	8264	3115	11379
		noneexposure %	0.72625	0.27375	1
		menarchelessthan13 %	0.551007	0.615248	0.56722
		%	0.411944	0.155276	0.56722
	1.00	n	6734	1948	8682
		noneexposure %	0.775628	0.224372	1
		menarchelessthan13 %	0.448993	0.384752	0.43278
		%	0.335676	0.0971038	0.43278
sum		n	14998	5063	20061
		noneexposure %	0.74762	0.25238	1
		menarchelessthan13 %	1	1	1
		%	0.74762	0.25238	1
